# Supplementary material for: 11β-HSD1 Inhibitor Alleviates Non-Alcoholic Fatty Liver Disease by Activating the AMPK/SIRT1 Signaling Pathway
Source: MDPI journal article supplement (doi:10.3390/nu14112358), 2022-06-06
Supplement: s1 [file s1]

## Article

# 11 $\beta$ -HSD1 Inhibitor Alleviates Non-Alcoholic Fatty Liver Disease by Activating the AMPK/SIRT1 Signaling Pathway

Ying Chen, Jiali Li, Meng Zhang, Wei Yang, Wenqi Qin, Qinzhou Zheng, Yanhui Chu, Yan Wu, Dan Wu and Xiaohuan Yuan \*

Heilongjiang Key Laboratory of Tissue Damage and Repair, College of Life Science, Mudanjiang Medical University, Mudanjiang 157011, China; chenying9435@126.com (Y.C.); lijiali0530@163.com (J.L.); zhangmengzi1125@163.com (M.Z.); yangwei19970531@163.com (W.Y.); qinwenqi0717@163.com (W.Q.); zz804873737@163.com (Q.Z.); yanhui\_chu@sina.com (Y.C.); wuyan@mdjmu.edu.cn (Y.W.); wudan@mdjmu.edu.cn (D.W.)

\* Correspondence: yuanxiaohuan@mdjmu.edu.cn; Tel.: +86-0453-6984401

**Abstract:** We investigated the effect of an 11 $\beta$ -HSD1 inhibitor (H8) on hepatic steatosis and its mechanism of action. Although H8, a curcumin derivative, has been shown to alleviate insulin resistance, its effect on non-alcoholic fatty liver disease (NAFLD) remains unknown. Rats were fed a high-fat diet (HFD) for 8 weeks, intraperitoneally injected with streptozotocin (STZ) to induce NAFLD, and then, treated with H8 (3 or 6 mg/kg/day) or curcumin (6 mg/kg/day) for 4 weeks, to evaluate the effects of H8 on NAFLD. H8 significantly alleviated HFD+STZ-induced lipid accumulation, fibrosis, and inflammation as well as improved liver function. Moreover, 11 $\beta$ -HSD1 overexpression was established by transfecting animals and HepG2 cells with lentivirus, carrying the 11 $\beta$ -HSD1 gene, to confirm that H8 improved NAFLD, by reducing 11 $\beta$ -HSD1. An AMP-activated protein kinase (AMPK) inhibitor (Compound C, 10  $\mu$ M for 2 h) was used to confirm that H8 increased AMPK, by inhibiting 11 $\beta$ -HSD1, thereby restoring lipid metabolic homeostasis. A silencing-related enzyme 1 (SIRT1) inhibitor (EX572, 10  $\mu$ M for 4 h) and a SIRT1 activator (SRT1720, 1  $\mu$ M for 4 h) were used to confirm that H8 exerted anti-inflammatory effects, by elevating SIRT1 expression. Our findings demonstrate that H8 alleviates hepatic steatosis by inhibiting 11 $\beta$ -HSD1, which activating the AMPK/SIRT1 signaling pathway.

**Keywords:** 11-beta-hydroxysteroid dehydrogenase type 1 (11 $\beta$ -HSD1); curcumin; non-alcoholic fatty liver disease (NAFLD); lipid metabolism; anti-inflammatory

**Citation:** Chen, Y.; Li, J.; Zhang, M.; Yang, W.; Qin, W.; Zheng, Q.; Chu, Y.; Wu, D.; Wu, Y.; Yuan, X. 11 $\beta$ -HSD1 Inhibitor Alleviates Non-Alcoholic Fatty Liver Disease by Activating the AMPK/SIRT1 Signaling Pathway. *Nutrients* **2022**, *14*, 2358. <https://doi.org/10.3390/nu14112358>

Academic Editor: Antoni Sureda

Received: 4 May 2022

Accepted: 5 June 2022

Published: 6 June 2022

**Publisher's Note:** MDPI stays neutral with regard to jurisdictional claims in published maps and institutional affiliations.

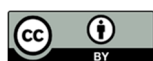

**Copyright:** © 2022 by the authors. Submitted for possible open access publication under the terms and conditions of the Creative Commons Attribution (CC BY) license (<https://creativecommons.org/licenses/by/4.0/>).

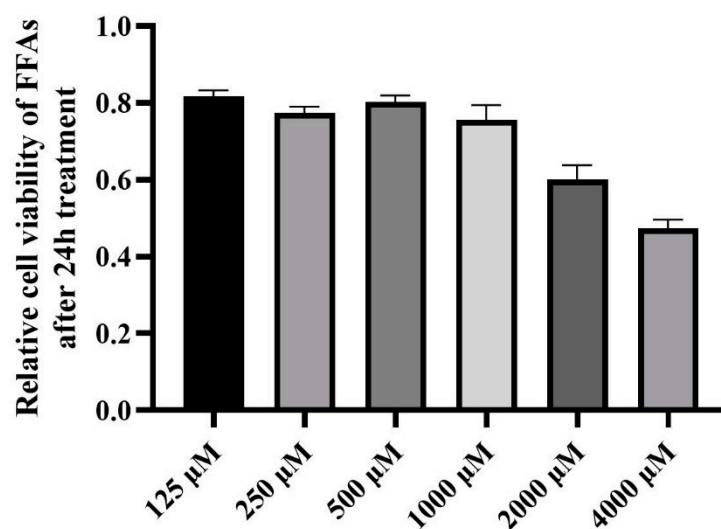

Supplementary Figure S1. Relative cell viability of FFAs after 24h treatment.

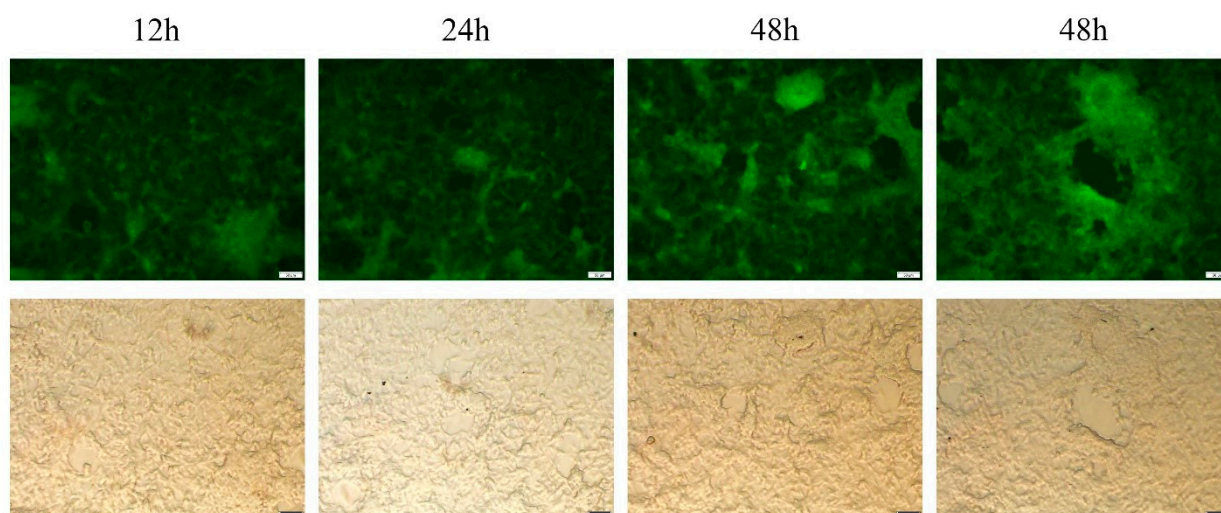

Supplementary Figure S2. Transfection efficiency

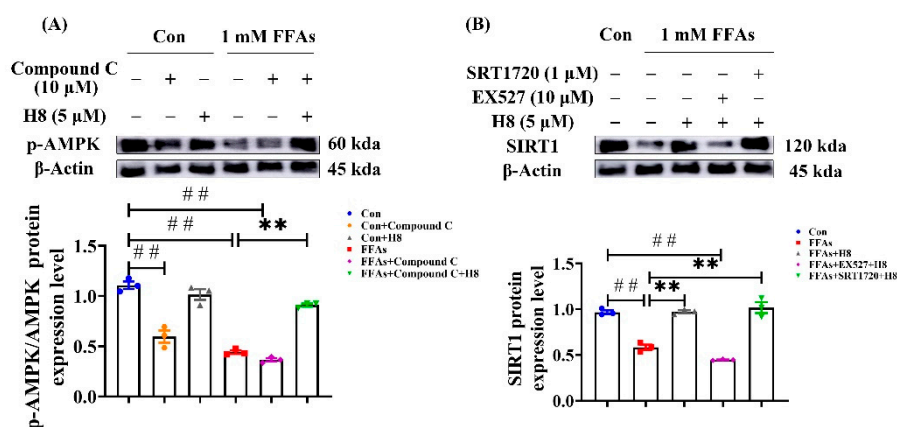

**Supplementary Figure S3.** AMPK and SIRT1 protein expression levels in HepG2 cells.  $n = 8$ , #  $p < 0.05$ , ##  $p < 0.01$  versus the control; \*  $p < 0.05$ , \*\*  $p < 0.01$  versus the HFD+STZ; ns  $p > 0.05$  not significant.

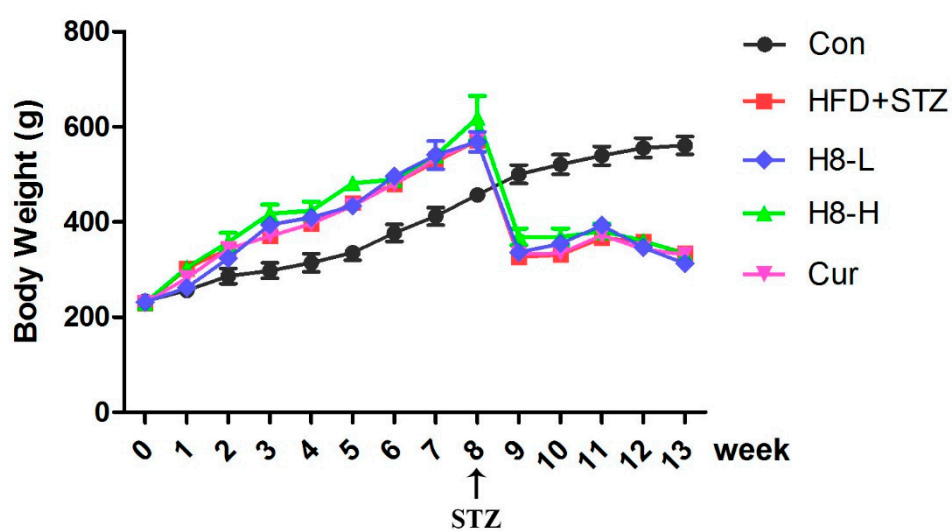

**Supplementary Figure S4.** Body weight change

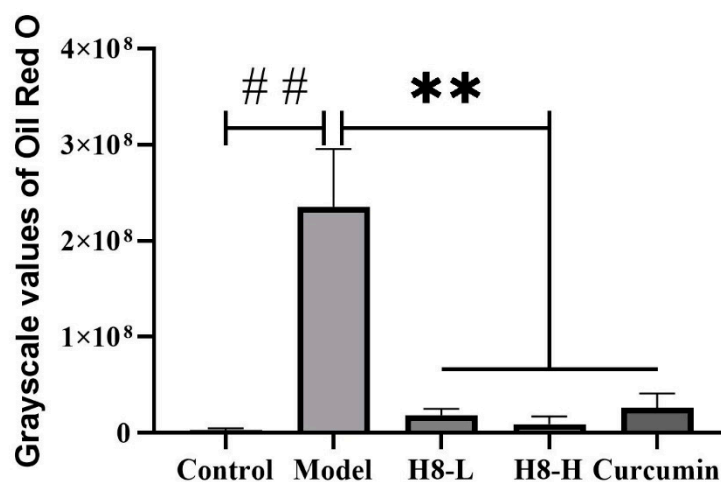

**Supplementary Figure S5.** Grayscale values of Oil Red O in rat liver.  $n = 8$ , #  $p < 0.05$ , ##  $p < 0.01$  versus the control; \*  $p < 0.05$ , \*\*  $p < 0.01$  versus the HFD+STZ; ns  $p > 0.05$  not significant.

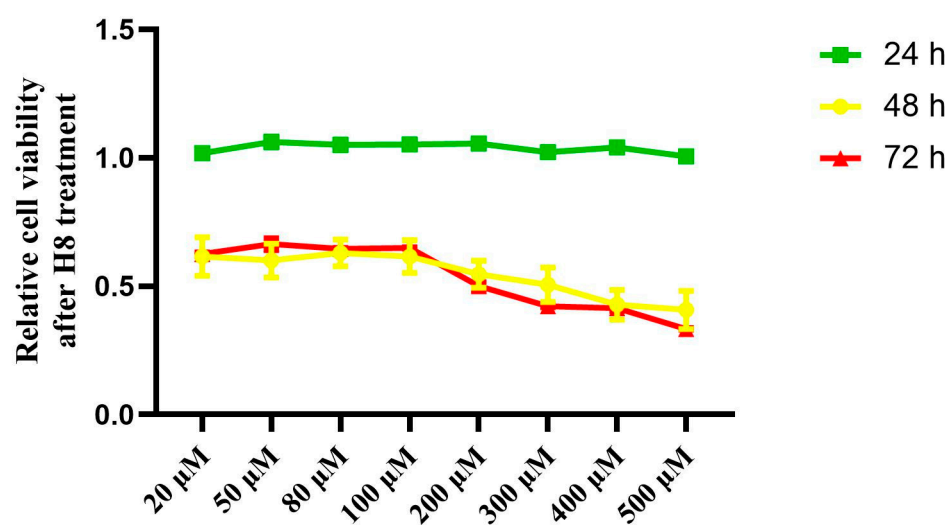

**Supplementary Figure S6.** Relative cell viability after H8 treatment.

**Supplementary Table S1.** The primer sequences used in qPCR.

| Gene                    | Forward                   | Reverse                   |
|-------------------------|---------------------------|---------------------------|
| GAPDH (rat)             | TGTGAAGCTCATTTCCTGGTAT    | GATGGGGACTCCTCAGCAAC      |
| GAPDH (human)           | CACCATCTTCCAGGAGCGAG      | TGATGACCCTTTTGGCTCCC      |
| $\beta$ -Actin (mouse)  | CCTAGGCACCAGGGTGTGAT      | AGCACAGGGTGCTCCTCA        |
| SIRT1 (mouse)           | TCGGCTACCGAGGTCCATA       | CCGCAAGGCGAGCATAGATA      |
| SIRT1 (rat)             | TGGAAGGAAAGCAATTTTGAAATA  | CTGCAACCTGCTCCAAGGTA      |
| SIRT1 (human)           | CATTCTTCAAGTTTGCAAAGGAAAT | CGAAGTAGTTTTCCTTCCTTATCTG |
| HSD1-11 $\beta$ (mouse) | ACTCAGACCTCGCTGTCTCT      | TGGGTCATTTTCCCAGCCAA      |
| HSD1-11 $\beta$ (rat)   | CTCCTCCATGGCTGGGAAAA      | GAAGCCGAGGACACAGAGAG      |
| SREBP1 (rat)            | TCTTGACCGACATCGAAGACAT    | GCCTGTGTCTCCTGTCTCAC      |
| SREBP1 (human)          | CTGACCGACATCGAAGGTGA      | CCAGCATAGGGTGGGTCAAA      |
| HSL (rat)               | GTCAAACCTCCAGAGCCAA       | GTGAGAATGCCGAGGCTGTA      |
| HSL (human)             | CCTCGTCTCACTCCTCCC        | TTAAGTAAGGCACAGCCCGC      |
| FAS (rat)               | TGTACCCTCTAGCTGGACCC      | CCAGGCTAAGGGCAATGGAA      |
| FAS (human)             | TCGTGTTGACTTCTCGCTCC      | CCATCTCTCAAGACCACGGC      |
| TNF- $\alpha$ (rat)     | ATGGGCTCCCTCTCATCAGT      | GCTTGGTGGTTTGCTACGAC      |
| TNF- $\alpha$ (human)   | TCTCCTTCTGATCGTGGCA       | CAGCTTGAGGGTTTGCTACAAC    |
| PGC-1 $\alpha$ (rat)    | TGGAGTGACATAGAGTGTGCTG    | TATGTTTCGCGGGCTCATTGT     |
| PGC-1 $\alpha$ (human)  | TCTGACCCCAGAGTCACCAA      | GTGGAGTTAGGCCTGCAGTT      |
| PPAR- $\gamma$ (rat)    | GCTTGTGAAGGATGCAAGGG      | GCCCAAACCTGATGGCATTG      |
| PPAR- $\gamma$ (human)  | GCAATCAAAGTGGAGCCTGC      | TCTCCGGAAGAAACCCTTGC      |

**Supplementary Table S2.** The primary antibodies used in WB.

| Gene                                                                                       | Forward                   | Reverse |
|--------------------------------------------------------------------------------------------|---------------------------|---------|
| $\beta$ -actin                                                                             | Cell Signaling Technology | 1:1000  |
| SIRT1                                                                                      | Affinity                  | 1:1000  |
| 11 $\beta$ -HSD1                                                                           | Abcam                     | 1:1000  |
| AMPK- $\alpha$ 1                                                                           | Abcam                     | 1:1000  |
| p-AMPK- $\alpha$ 1                                                                         | Abcam                     | 1:1000  |
| sterol regulatory element binding protein 1 (SREBP1)                                       | Abcam                     | 1:1000  |
| fatty acid synthase (FASN)                                                                 | Affinity                  | 1:1000  |
| carnitine palmitoyltransferase 1 $\beta$ (CPT-1 $\beta$ )                                  | Abcam                     | 1:1000  |
| acetyl coenzyme A carboxylase (ACC1)                                                       | Abcam                     | 1:1000  |
| p-ACC1                                                                                     | Cell Signaling Technology | 1:1000  |
| hormone-sensitive triglyceride lipase (HSL)                                                | Abcam                     | 1:1000  |
| interleukin-6 (IL-6)                                                                       | Abcam                     | 1:500   |
| interleukin-17 (IL-17)                                                                     | Abcam                     | 1:1000  |
| tumor necrosis factor- $\alpha$ (TNF- $\alpha$ )                                           | Bioss                     | 1:500   |
| peroxisome proliferator-activator receptor gamma (PPAR- $\gamma$ )                         | Affinity                  | 1:1000  |
| peroxisome proliferator-activated receptor gamma coactivator 1- $\alpha$ (PGC-1 $\alpha$ ) | Affinity                  | 1:1000  |
| nuclear factor kappa-B p65 (NF-kB p65)                                                     | Abcam                     | 1:1000  |
| NF-kB-p-p65                                                                                | Affinity                  | 1:1000  |
